# Supplementary material for: Discrimination between Eggs from Stink Bugs Species in Europe Using MALDI-TOF MS
Source: MDPI journal article supplement (doi:10.3390/insects12070587), 2021-06-28
Supplement: s1 [file s1]

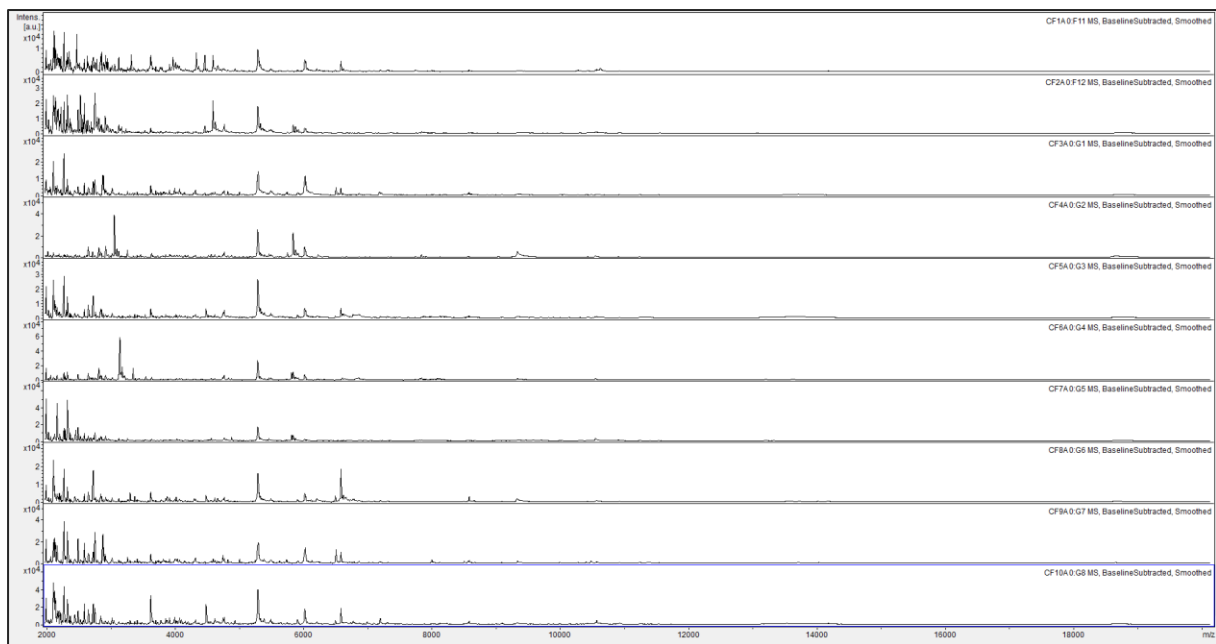

**Figure S1.** MALDI-TOF MS spectra of acid-soluble egg proteins from CF = *Capocoris fuscispinus* with, from top to bottom, replicates 1 to 10. Spectra are shown baseline-subtracted, smoothed, with y-axis autoscaling, and covering the mass range 2 kDa to 20 kDa (with x-axis scale increments of 2 kDa).

**Figure S2**

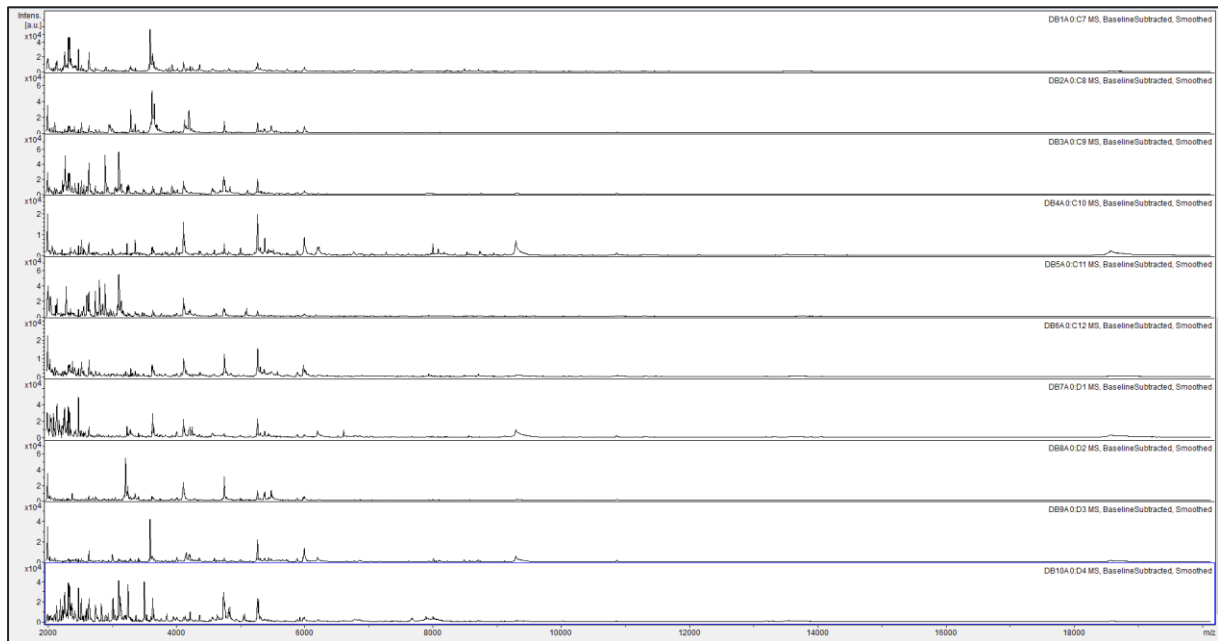

**Figure S2** MALDI-TOF MS spectra of acid-soluble egg proteins from DB = *Dolycoris baccarum* with, from top to bottom, replicates 1 to 10. Spectra are shown baseline-subtracted, smoothed, with y-axis autoscaling, and covering the mass range 2 kDa to 20 kDa (with x-axis scale increments of 2 kDa).

**Figure S3**

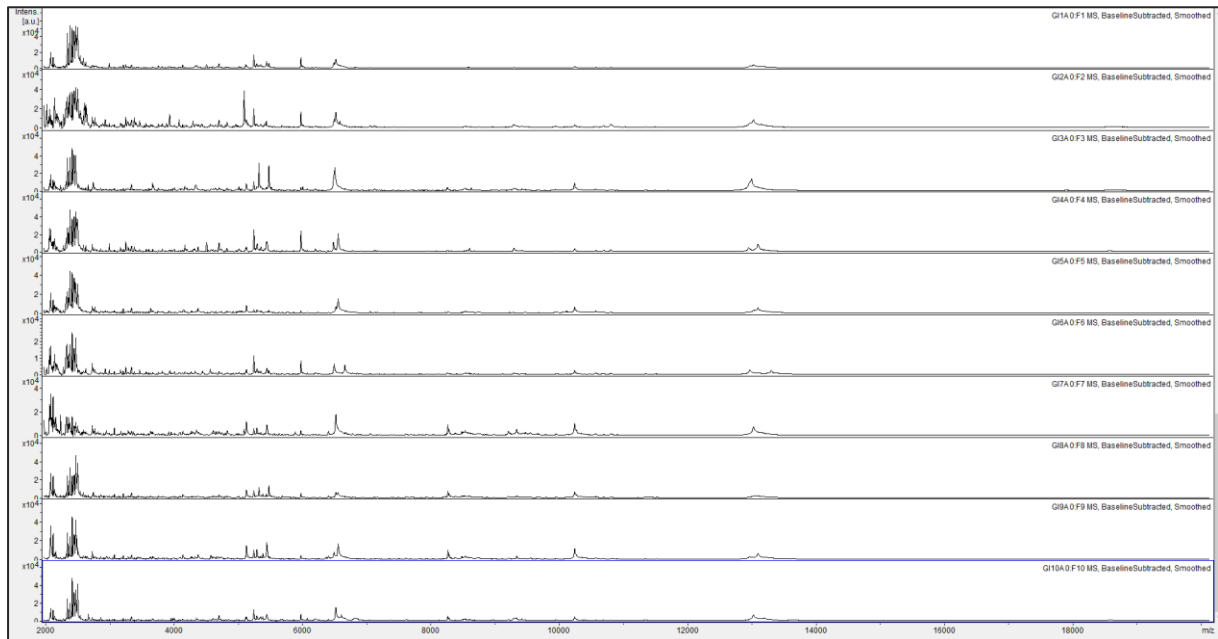

**Figure S3** MALDI-TOF MS spectra of acid-soluble egg proteins from GI = *Graphosoma italicum* with, from top to bottom, replicates 1 to 10. Spectra are shown baseline-subtracted, smoothed, with y-axis autoscaling, and covering the mass range 2 kDa to 20 kDa (with x-axis scale increments of 2 kDa).

**Figure S4**

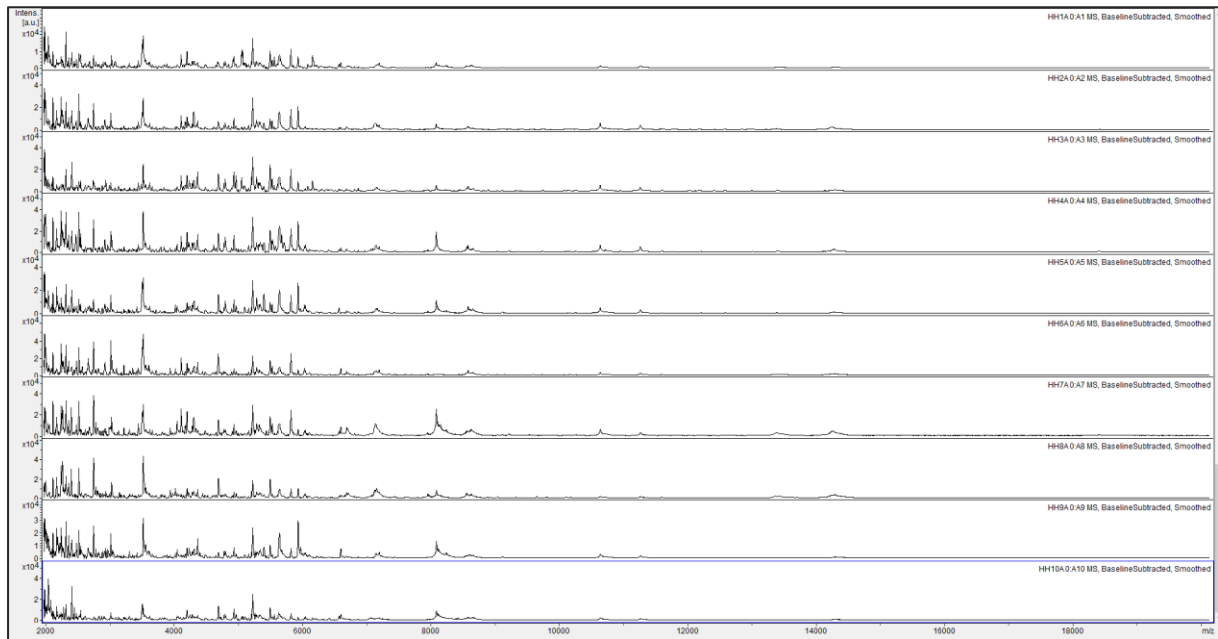

**Figure S4** MALDI-TOF MS spectra of acid-soluble egg proteins from HH = *Halyomorpha halys* with, from top to bottom, replicates 1 to 10. Spectra are shown baseline-subtracted, smoothed, with y-axis autoscaling, and covering the mass range 2 kDa to 20 kDa (with x-axis scale increments of 2 kDa).

**Figure S5**

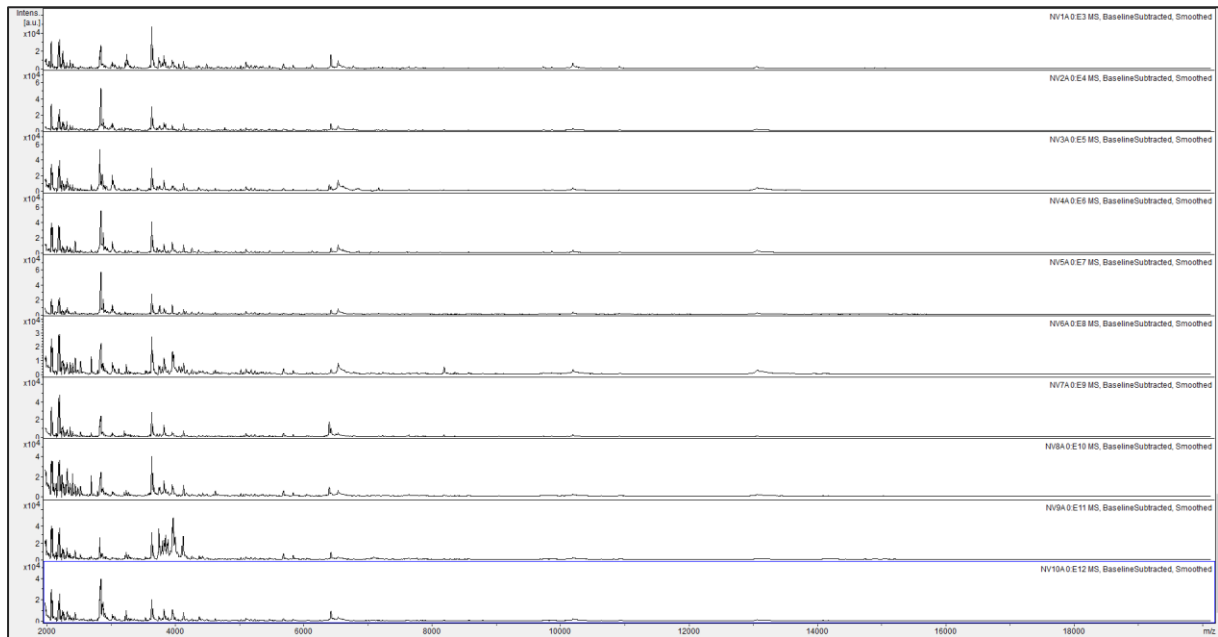

**Figure S5** MALDI-TOF MS spectra of acid-soluble egg proteins from NV = *Nezara viridula* with, from top to bottom, replicates 1 to 10. Spectra are shown baseline-subtracted, smoothed, with y-axis autoscaling, and covering the mass range 2 kDa to 20 kDa (with x-axis scale increments of 2 kDa).

**Figure S6**

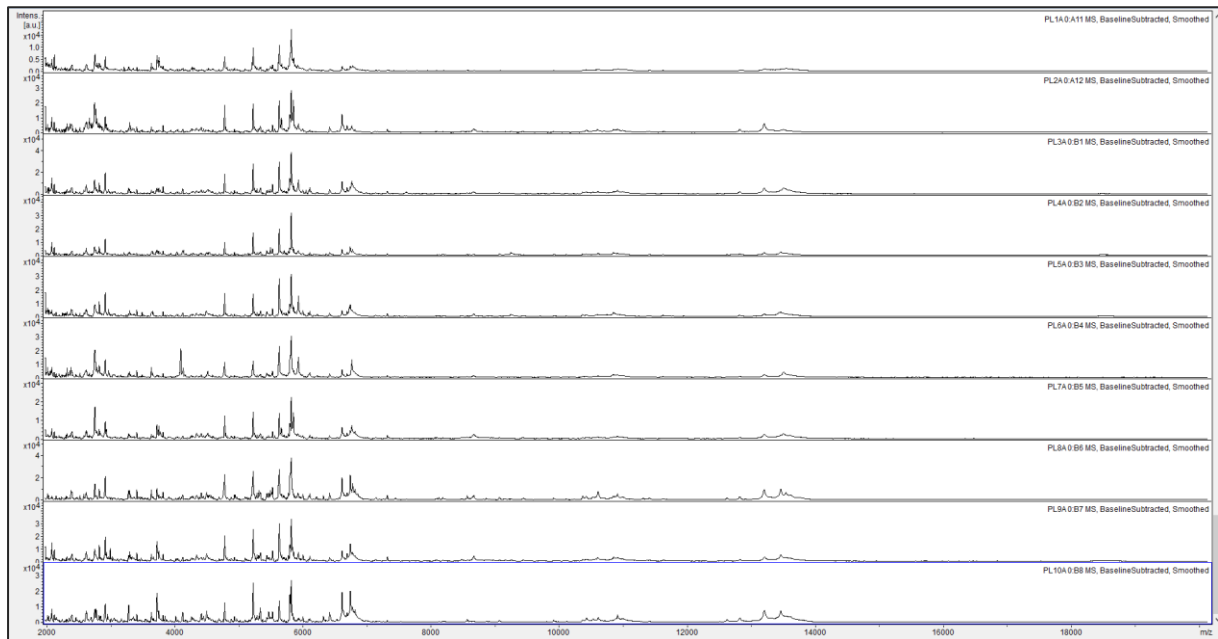

**Figure S6** MALDI-TOF MS spectra of acid-soluble egg proteins from PL = *Piezodorus lituratus* with, from top to bottom, replicates 1 to 10. Spectra are shown baseline-subtracted, smoothed, with y-axis autoscaling, and covering the mass range 2 kDa to 20 kDa (with x-axis scale increments of 2 kDa).

**Figure S7**

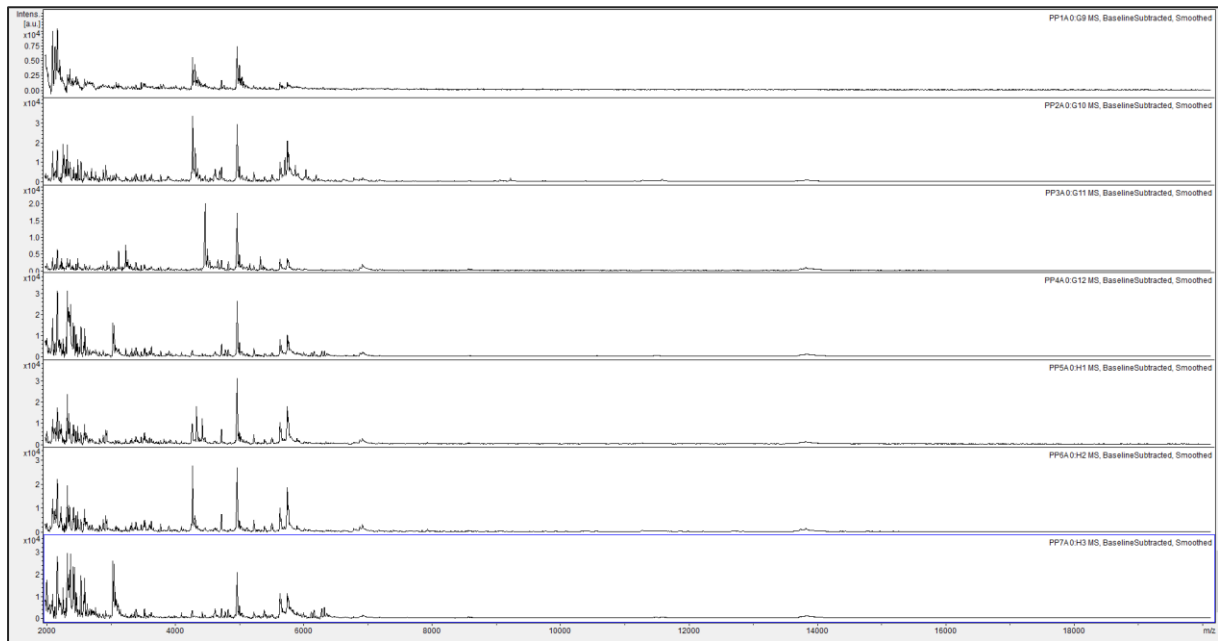

**Figure S7** MALDI-TOF MS spectra of acid-soluble egg proteins from PP = *Palomena prasina* with, from top to bottom, replicates 1 to 7. Spectra are shown baseline-subtracted, smoothed, with y-axis autoscaling, and covering the mass range 2 kDa to 20 kDa (with x-axis scale increments of 2 kDa).

**Figure S8**

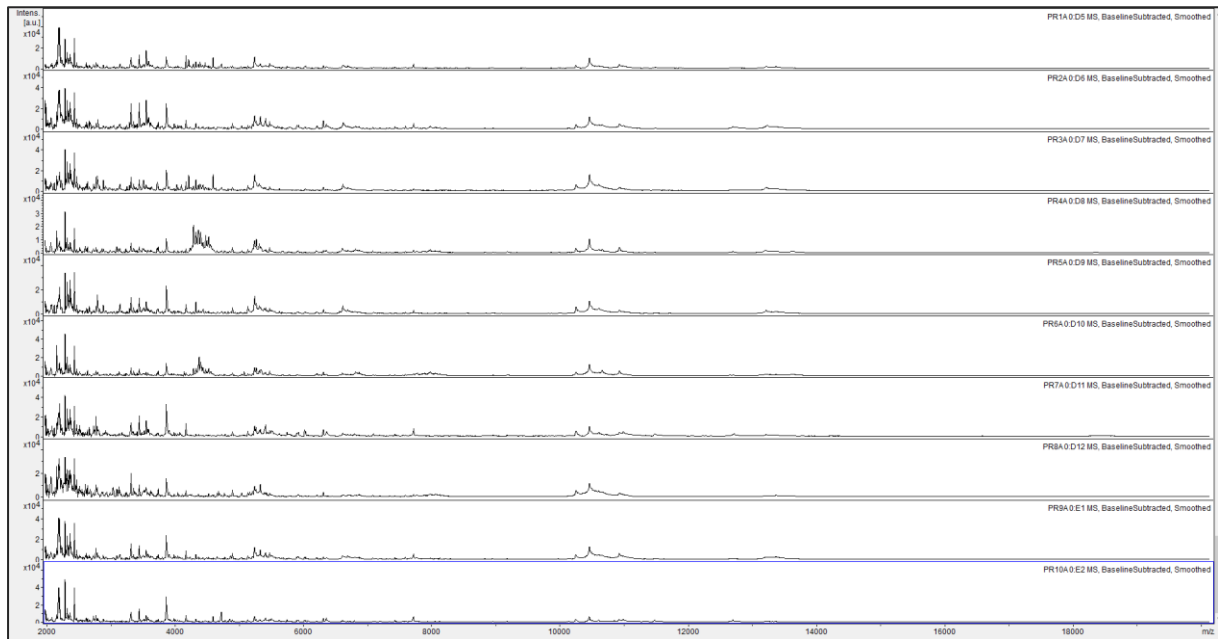

**Figure S8** MALDI-TOF MS spectra of acid-soluble egg proteins from PR = *Pentatoma rufipes* with, from top to bottom, replicates 1 to 10. Spectra are shown baseline-subtracted, smoothed, with y-axis autoscaling, and covering the mass range 2 kDa to 20 kDa (with x-axis scale increments of 2 kDa).



**Figure S9**

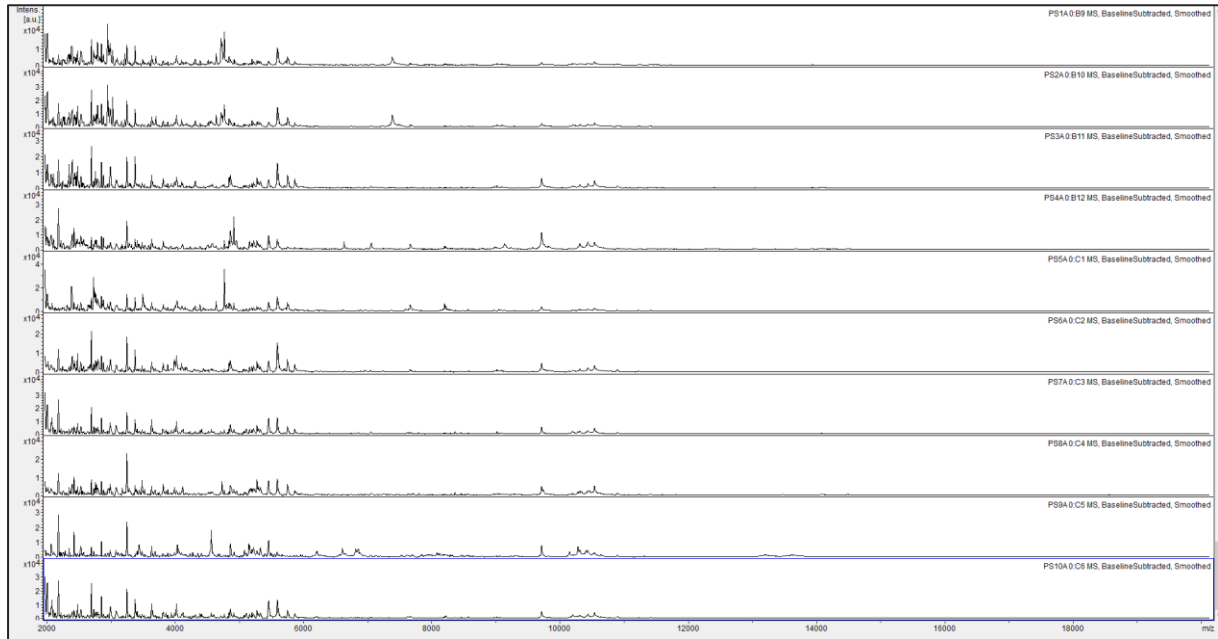

**Figure S9** MALDI-TOF MS spectra of acid-soluble egg proteins from PS = *Peribalus strictus* with, from top to bottom, replicates 1 to 10. Spectra are shown baseline-subtracted, smoothed, with y-axis autoscaling, and covering the mass range 2 kDa to 20 kDa (with x-axis scale increments of 2 kDa).

**Table S1** Bruker scores for comparisons between reference spectra (rows) and blind-test spectra (columns) subsequently identified as *Capocoris fuscispinus*, *Dolycoris baccarum*, and *Graphosoma italicum*.

|  | CF | DB |
|--|----|----|----|----|----|----|----|----|----|----|----|----|----|----|----|----|----|----|----|----|----|----|----|----|----|----|----|----|----|----|----|----|----|----|----|----|----|----|----|----|----|----|----|----|----|----|----|----|----|----|----|----|----|----|----|----|----|----|----|----|----|----|----|----|----|----|----|----|----|----|----|----|----|----|----|----|----|----|----|----|----|----|----|----|----|----|----|----|----|----|----|----|----|----|----|----|----|----|----|----|----|----|----|----|----|----|----|----|----|----|----|----|----|----|----|----|----|----|----|----|----|----|----|----|----|----|----|----|----|----|----|----|----|----|----|----|----|----|----|----|----|----|----|----|----|----|----|----|----|----|----|----|----|----|----|----|----|----|----|----|----|----|----|----|----|----|----|----|----|----|----|----|----|----|----|----|----|----|----|----|----|----|----|----|----|----|----|----|----|----|----|----|----|----|----|----|----|----|----|----|----|----|----|----|----|----|----|----|----|----|----|----|----|----|----|----|----|----|----|----|----|----|----|----|----|----|----|----|----|----|----|----|----|----|----|----|----|----|----|----|----|----|----|----|----|----|----|----|----|----|----|----|----|----|----|----|----|----|----|----|----|----|----|----|----|----|----|----|----|----|----|----|----|----|----|----|----|----|----|----|----|----|----|----|----|----|----|----|----|----|----|----|----|----|----|----|----|----|----|----|----|----|----|----|----|----|----|----|----|----|----|----|----|----|----|----|----|----|----|----|----|----|----|----|----|----|----|----|----|----|----|----|----|----|----|----|----|----|----|----|----|----|----|----|----|----|----|----|----|----|----|----|----|----|----|----|----|----|----|----|----|----|----|----|----|----|----|----|----|----|----|----|----|----|----|----|----|----|----|----|----|----|----|----|----|----|----|----|----|----|----|----|----|----|----|----|----|----|----|----|----|----|----|----|----|----|----|----|----|----|----|----|----|----|----|----|----|----|----|----|----|----|----|----|----|----|----|----|----|----|----|----|----|----|----|----|----|----|----|----|----|----|----|----|----|----|----|----|----|----|----|----|----|----|----|----|----|----|----|----|----|----|----|----|----|----|----|----|----|----|----|----|----|----|----|----|----|----|----|----|----|----|----|----|----|----|----|----|----|----|----|----|----|----|----|----|----|----|----|----|----|----|----|----|----|----|----|----|----|----|----|----|----|----|----|----|----|----|----|----|----|----|----|----|----|----|----|----|----|----|----|----|----|----|----|----|----|----|----|----|----|----|----|----|----|----|----|----|----|----|----|----|----|----|----|----|----|----|----|----|----|----|----|----|----|----|----|----|----|----|----|----|----|----|----|----|----|----|----|----|----|----|----|----|----|----|----|----|----|----|----|----|----|----|----|----|----|----|----|----|----|----|----|----|----|----|----|----|----|----|----|----|----|----|----|----|----|----|----|----|----|----|----|----|----|----|----|----|----|----|----|----|----|----|----|----|----|----|----|----|----|----|----|----|----|----|----|----|----|----|----|----|----|----|----|----|----|----|----|----|----|----|----|----|----|----|----|----|----|----|----|----|----|----|----|----|----|----|----|----|----|----|----|----|----|----|----|----|----|----|----|----|----|----|----|----|----|----|----|----|----|----|----|----|----|----|----|----|----|----|----|----|----|----|----|----|----|----|----|----|----|----|----|----|----|----|----|----|----|----|----|----|----|----|----|----|----|----|----|----|----|----|----|----|----|----|----|----|----|----|----|----|----|----|----|----|----|----|----|----|----|----|----|----|----|----|----|----|----|----|----|----|----|----|----|----|----|----|----|----|----|----|----|----|----|----|----|----|----|----|----|----|----|----|----|----|----|----|----|----|----|----|----|----|----|----|----|----|----|----|----|----|----|----|----|----|----|----|----|----|----|----|----|----|----|----|----|----|----|----|----|----|----|----|----|----|----|----|----|----|----|----|----|----|----|----|----|----|----|----|----|----|----|----|----|----|----|----|----|----|----|----|----|----|----|----|----|----|----|----|----|----|----|----|----|----|----|----|----|----|----|----|----|----|----|----|----|----|----|----|----|----|----|----|----|----|----|----|----|----|----|----|----|----|----|----|----|----|----|----|----|----|----|----|----|----|----|----|----|----|----|----|----|----|----|----|----|----|----|----|----|----|----|----|----|----|----|----|----|----|----|----|----|----|----|----|----|----|----|----|----|----|----|----|----|----|----|----|----|----|----|----|----|----|----|----|----|----|----|----|----|----|----|----|----|----|----|----|----|----|----|----|----|----|----|----|----|----|----|----|----|----|----|----|----|----|----|----|----|----|----|----|----|----|----|----|----|----|----|----|----|----|----|----|----|----|----|----|----|----|----|----|----|----|----|----|----|----|----|----|----|----|----|----|----|----|----|----|----|----|----|----|----|----|----|----|----|----|----|----|----|----|----|----|----|----|----|----|----|----|----|----|----|----|----|----|----|----|----|----|----|----|----|----|----|----|----|----|----|----|----|----|----|----|----|----|----|----|----|----|----|----|----|----|----|----|----|----|----|----|----|----|----|----|----|----|----|----|----|----|----|----|----|----|----|----|
|--|----|----|----|----|----|----|----|----|----|----|----|----|----|----|----|----|----|----|----|----|----|----|----|----|----|----|----|----|----|----|----|----|----|----|----|----|----|----|----|----|----|----|----|----|----|----|----|----|----|----|----|----|----|----|----|----|----|----|----|----|----|----|----|----|----|----|----|----|----|----|----|----|----|----|----|----|----|----|----|----|----|----|----|----|----|----|----|----|----|----|----|----|----|----|----|----|----|----|----|----|----|----|----|----|----|----|----|----|----|----|----|----|----|----|----|----|----|----|----|----|----|----|----|----|----|----|----|----|----|----|----|----|----|----|----|----|----|----|----|----|----|----|----|----|----|----|----|----|----|----|----|----|----|----|----|----|----|----|----|----|----|----|----|----|----|----|----|----|----|----|----|----|----|----|----|----|----|----|----|----|----|----|----|----|----|----|----|----|----|----|----|----|----|----|----|----|----|----|----|----|----|----|----|----|----|----|----|----|----|----|----|----|----|----|----|----|----|----|----|----|----|----|----|----|----|----|----|----|----|----|----|----|----|----|----|----|----|----|----|----|----|----|----|----|----|----|----|----|----|----|----|----|----|----|----|----|----|----|----|----|----|----|----|----|----|----|----|----|----|----|----|----|----|----|----|----|----|----|----|----|----|----|----|----|----|----|----|----|----|----|----|----|----|----|----|----|----|----|----|----|----|----|----|----|----|----|----|----|----|----|----|----|----|----|----|----|----|----|----|----|----|----|----|----|----|----|----|----|----|----|----|----|----|----|----|----|----|----|----|----|----|----|----|----|----|----|----|----|----|----|----|----|----|----|----|----|----|----|----|----|----|----|----|----|----|----|----|----|----|----|----|----|----|----|----|----|----|----|----|----|----|----|----|----|----|----|----|----|----|----|----|----|----|----|----|----|----|----|----|----|----|----|----|----|----|----|----|----|----|----|----|----|----|----|----|----|----|----|----|----|----|----|----|----|----|----|----|----|----|----|----|----|----|----|----|----|----|----|----|----|----|----|----|----|----|----|----|----|----|----|----|----|----|----|----|----|----|----|----|----|----|----|----|----|----|----|----|----|----|----|----|----|----|----|----|----|----|----|----|----|----|----|----|----|----|----|----|----|----|----|----|----|----|----|----|----|----|----|----|----|----|----|----|----|----|----|----|----|----|----|----|----|----|----|----|----|----|----|----|----|----|----|----|----|----|----|----|----|----|----|----|----|----|----|----|----|----|----|----|----|----|----|----|----|----|----|----|----|----|----|----|----|----|----|----|----|----|----|----|----|----|----|----|----|----|----|----|----|----|----|----|----|----|----|----|----|----|----|----|----|----|----|----|----|----|----|----|----|----|----|----|----|----|----|----|----|----|----|----|----|----|----|----|----|----|----|----|----|----|----|----|----|----|----|----|----|----|----|----|----|----|----|----|----|----|----|----|----|----|----|----|----|----|----|----|----|----|----|----|----|----|----|----|----|----|----|----|----|----|----|----|----|----|----|----|----|----|----|----|----|----|----|----|----|----|----|----|----|----|----|----|----|----|----|----|----|----|----|----|----|----|----|----|----|----|----|----|----|----|----|----|----|----|----|----|----|----|----|----|----|----|----|----|----|----|----|----|----|----|----|----|----|----|----|----|----|----|----|----|----|----|----|----|----|----|----|----|----|----|----|----|----|----|----|----|----|----|----|----|----|----|----|----|----|----|----|----|----|----|----|----|----|----|----|----|----|----|----|----|----|----|----|----|----|----|----|----|----|----|----|----|----|----|----|----|----|----|----|----|----|----|----|----|----|----|----|----|----|----|----|----|----|----|----|----|----|----|----|----|----|----|----|----|----|----|----|----|----|----|----|----|----|----|----|----|----|----|----|----|----|----|----|----|----|----|----|----|----|----|----|----|----|----|----|----|----|----|----|----|----|----|----|----|----|----|----|----|----|----|----|----|----|----|----|----|----|----|----|----|----|----|----|----|----|----|----|----|----|----|----|----|----|----|----|----|----|----|----|----|----|----|----|----|----|----|----|----|----|----|----|----|----|----|----|----|----|----|----|----|----|----|----|----|----|----|----|----|----|----|----|----|----|----|----|----|----|----|----|----|----|----|----|----|----|----|----|----|----|----|----|----|----|----|----|----|----|----|----|----|----|----|----|----|----|----|----|----|----|----|----|----|----|----|----|----|----|----|----|----|----|----|----|----|----|----|----|----|----|----|----|----|----|----|----|----|----|----|----|----|----|----|----|----|----|----|----|----|----|----|----|----|----|----|----|----|----|----|----|----|----|----|----|----|----|----|----|----|----|----|----|----|----|----|----|----|----|----|----|----|----|----|----|----|----|----|----|----|----|----|----|----|----|----|----|----|----|----|----|----|----|----|----|----|----|----|----|----|----|----|----|----|----|----|----|----|----|----|----|----|----|----|----|----|----|----|----|----|----|----|----|----|----|----|----|----|----|----|----|----|----|----|----|----|----|----|----|----|----|----|----|----|----|----|----|----|----|----|----|----|----|----|----|----|----|----|----|----|----|----|----|----|----|----|----|----|----|

|       |       |       |       |       |       |       |       |       |       |       |       |       |       |       |       |       |       |       |       |       |       |       |       |       |       |       |       |       |       |       |       |
|-------|-------|-------|-------|-------|-------|-------|-------|-------|-------|-------|-------|-------|-------|-------|-------|-------|-------|-------|-------|-------|-------|-------|-------|-------|-------|-------|-------|-------|-------|-------|-------|
| GI6A  | 0.423 | 0.913 | 0.000 | 0.110 | 0.331 | 0.463 | 0.403 | 0.000 | 0.019 | 0.299 | 0.067 | 0.874 | 0.269 | 0.114 | 0.138 | 0.534 | 0.267 | 0.903 | 1.054 | 0.379 | 1.333 | 1.195 | 1.180 | 2.065 | 1.913 | 2.075 | 2.680 | 1.995 | 1.672 | 1.556 |       |
| GI7A  | 0.507 | 0.000 | 0.114 | 0.577 | 0.080 | 0.051 | 0.000 | 0.000 | 0.000 | 0.505 | 0.020 | 0.398 | 0.518 | 0.223 | 0.254 | 0.000 | 0.662 | 1.018 | 0.000 | 0.306 | 2.621 | 1.600 | 1.574 | 1.537 | 2.024 | 1.611 | 1.693 | 1.825 | 2.046 | 2.016 |       |
| GI8A  | 0.054 | 0.326 | 0.416 | 0.244 | 0.191 | 0.285 | 0.143 | 0.000 | 0.721 | 0.454 | 0.000 | 0.000 | 0.000 | 0.000 | 0.061 | 0.241 | 0.208 | 0.679 | 0.202 | 0.166 | 2.198 | 1.636 | 1.687 | 1.622 | 1.951 | 1.579 | 1.718 | 1.598 | 2.142 | 2.458 |       |
| GI9A  | 0.593 | 0.638 | 0.535 | 0.655 | 0.306 | 0.000 | 0.439 | 0.184 | 0.426 | 0.626 | 0.000 | 0.389 | 0.214 | 0.635 | 0.000 | 0.092 | 0.430 | 0.953 | 0.000 | 0.000 | 2.135 | 1.753 | 1.461 | 1.912 | 2.013 | 1.440 | 1.739 | 1.547 | 2.506 | 2.116 |       |
| HH10A | 0.295 | 0.690 | 0.207 | 0.000 | 0.452 | 0.194 | 0.303 | 0.034 | 0.399 | 0.289 | 0.209 | 0.083 | 0.000 | 0.379 | 0.474 | 0.000 | 0.029 | 0.038 | 0.000 | 0.455 | 0.000 | 0.391 | 0.241 | 0.125 | 0.535 | 0.192 | 0.074 | 0.000 | 0.000 | 0.000 |       |
| HH1A  | 0.303 | 0.826 | 0.279 | 0.000 | 0.506 | 0.000 | 0.432 | 0.373 | 0.561 | 0.259 | 0.270 | 0.209 | 0.134 | 0.835 | 0.024 | 0.000 | 0.169 | 0.219 | 0.567 | 0.000 | 0.000 | 0.344 | 0.640 | 0.000 | 0.451 | 0.000 | 0.281 | 0.667 | 0.414 | 0.271 |       |
| HH2A  | 0.009 | 0.701 | 0.715 | 0.000 | 0.520 | 0.111 | 0.546 | 0.705 | 0.618 | 0.541 | 0.006 | 0.000 | 0.000 | 0.106 | 0.487 | 0.000 | 0.147 | 0.000 | 0.162 | 0.473 | 0.252 | 0.000 | 0.693 | 0.453 | 0.231 | 0.183 | 0.091 | 0.302 | 0.353 | 0.000 |       |
| HH3A  | 0.608 | 0.438 | 0.427 | 0.228 | 0.744 | 0.119 | 0.437 | 0.378 | 0.802 | 0.604 | 0.409 | 0.000 | 0.000 | 0.222 | 0.493 | 0.000 | 0.000 | 0.000 | 0.215 | 0.520 | 0.000 | 0.510 | 0.223 | 0.315 | 0.443 | 0.304 | 0.050 | 0.634 | 0.271 | 0.000 |       |
| HH4A  | 0.245 | 0.862 | 0.090 | 0.315 | 0.079 | 0.100 | 0.400 | 0.535 | 0.788 | 0.698 | 0.176 | 0.230 | 0.000 | 0.000 | 0.554 | 0.000 | 0.320 | 0.214 | 0.000 | 0.716 | 0.113 | 0.213 | 0.124 | 0.163 | 0.622 | 0.236 | 0.457 | 0.032 | 0.391 | 0.247 |       |
| HH5A  | 0.542 | 0.897 | 0.198 | 0.000 | 0.415 | 0.000 | 0.688 | 0.371 | 0.512 | 0.458 | 0.038 | 0.000 | 0.000 | 0.326 | 0.000 | 0.000 | 0.000 | 0.000 | 0.193 | 0.000 | 0.222 | 0.000 | 0.384 | 0.463 | 0.241 | 0.220 | 0.799 | 0.000 | 0.294 | 0.012 |       |
| HH6A  | 0.433 | 0.867 | 0.245 | 0.126 | 0.636 | 0.124 | 0.265 | 0.355 | 0.559 | 0.254 | 0.000 | 0.000 | 0.215 | 0.155 | 0.028 | 0.000 | 0.047 | 0.000 | 0.439 | 0.358 | 0.000 | 0.256 | 0.392 | 0.242 | 0.454 | 0.121 | 0.613 | 0.724 | 0.509 | 0.508 |       |
| HH7A  | 0.306 | 0.592 | 0.158 | 0.030 | 0.424 | 0.000 | 0.087 | 0.038 | 0.674 | 0.260 | 0.000 | 0.000 | 0.000 | 0.266 | 0.255 | 0.335 | 0.357 | 0.000 | 0.430 | 0.346 | 0.000 | 0.709 | 0.111 | 0.376 | 0.429 | 0.216 | 0.276 | 0.257 | 0.653 | 0.000 |       |
| HH8A  | 0.116 | 0.902 | 0.000 | 0.135 | 0.000 | 0.582 | 0.000 | 0.000 | 0.003 | 0.000 | 0.000 | 0.000 | 0.000 | 0.000 | 0.000 | 0.000 | 0.000 | 0.000 | 0.000 | 0.000 | 0.000 | 0.000 | 0.049 | 0.782 | 0.334 | 0.000 | 0.000 | 0.696 | 0.000 | 0.531 | 0.000 |
| HH9A  | 0.298 | 0.965 | 0.110 | 0.000 | 0.223 | 0.000 | 0.000 | 0.207 | 0.691 | 0.461 | 0.547 | 0.296 | 0.514 | 0.000 | 0.198 | 0.000 | 0.587 | 0.627 | 0.009 | 0.627 | 0.008 | 0.232 | 0.841 | 0.000 | 0.671 | 0.657 | 0.219 | 0.000 | 0.042 | 0.000 |       |
| NV10A | 0.000 | 0.532 | 0.189 | 0.615 | 0.511 | 0.275 | 0.712 | 0.485 | 0.157 | 0.674 | 0.322 | 0.591 | 0.000 | 0.000 | 0.058 | 0.000 | 0.501 | 0.000 | 0.752 | 0.540 | 0.000 | 0.095 | 0.000 | 0.000 | 0.142 | 0.112 | 0.056 | 0.294 | 0.000 | 0.102 |       |
| NV1A  | 0.796 | 0.000 | 0.452 | 0.343 | 0.413 | 0.431 | 0.000 | 0.000 | 0.000 | 0.698 | 1.016 | 0.752 | 0.579 | 0.207 | 0.599 | 0.628 | 0.000 | 0.971 | 0.292 | 0.360 | 0.000 | 0.803 | 0.000 | 0.010 | 0.613 | 0.000 | 0.153 | 0.220 | 0.705 | 0.000 |       |
| NV2A  | 0.000 | 0.000 | 0.000 | 0.141 | 0.000 | 0.000 | 0.000 | 0.104 | 0.711 | 0.101 | 0.324 | 0.927 | 0.044 | 0.892 | 0.359 | 0.153 | 0.000 | 0.408 | 0.778 | 0.185 | 0.075 | 0.241 | 0.441 | 0.000 | 0.121 | 0.000 | 0.000 | 0.195 | 0.243 | 0.282 |       |
| NV3A  | 0.000 | 0.439 | 0.213 | 0.263 | 0.288 | 0.463 | 0.596 | 0.280 | 0.453 | 0.436 | 0.374 | 0.773 | 0.615 | 0.464 | 0.228 | 0.346 | 0.720 | 0.385 | 0.805 | 0.728 | 0.179 | 0.189 | 0.000 | 0.013 | 0.310 | 0.293 | 0.039 | 0.250 | 0.225 | 0.659 |       |
| NV4A  | 0.087 | 0.842 | 0.522 | 0.411 | 0.007 | 0.373 | 0.784 | 0.000 | 0.715 | 0.731 | 0.465 | 0.910 | 0.616 | 0.515 | 0.000 | 0.560 | 0.810 | 0.470 | 0.990 | 1.119 | 0.000 | 0.299 | 0.000 | 0.231 | 0.215 | 0.393 | 0.653 | 0.374 | 0.000 | 0.509 |       |
| NV5A  | 0.199 | 0.764 | 0.448 | 0.569 | 0.000 | 0.853 | 0.947 | 0.494 | 0.805 | 0.610 | 0.000 | 0.964 | 0.000 | 0.093 | 0.404 | 0.525 | 0.000 | 0.617 | 0.985 | 0.956 | 0.000 | 0.048 | 0.078 | 0.000 | 0.000 | 0.418 | 0.000 | 0.286 | 0.169 | 0.369 |       |
| NV6A  | 0.000 | 1.095 | 0.600 | 0.366 | 0.000 | 0.479 | 0.541 | 0.239 | 0.060 | 0.668 | 0.671 | 0.628 | 0.000 | 0.337 | 0.000 | 0.000 | 0.168 | 0.584 | 0.172 | 0.000 | 0.150 | 0.103 | 0.000 | 0.000 | 0.197 | 0.000 | 0.000 | 0.215 | 0.051 | 0.000 |       |
| NV7A  | 0.081 | 0.277 | 0.000 | 0.000 | 0.000 | 0.070 | 0.000 | 0.000 | 0.355 | 0.288 | 0.000 | 1.167 | 0.424 | 0.130 | 0.034 | 0.225 | 0.085 | 0.342 | 0.857 | 0.506 | 0.000 | 0.273 | 0.084 | 0.395 | 0.421 | 0.000 | 0.000 | 0.384 | 0.000 | 0.404 |       |
| NV8A  | 0.000 | 0.804 | 0.000 | 0.000 | 0.313 | 0.151 | 0.641 | 0.263 | 0.521 | 0.093 | 0.621 | 0.824 | 0.000 | 0.461 | 0.000 | 0.051 | 0.000 | 0.000 | 0.418 | 0.416 | 0.250 | 0.000 | 0.538 | 0.000 | 0.100 | 0.039 | 0.138 | 0.208 | 0.258 | 0.041 |       |
| NV9A  | 0.000 | 0.621 | 0.295 | 0.000 | 0.324 | 0.001 | 0.374 | 0.000 | 0.133 | 0.253 | 0.432 | 0.794 | 0.000 | 0.260 | 0.545 | 0.000 | 0.006 | 0.561 | 1.118 | 0.284 | 0.205 | 0.000 | 0.000 | 0.000 | 0.000 | 0.000 | 0.000 | 0.121 | 0.668 | 0.000 | 0.218 |
| PL10A | 0.065 | 0.233 | 0.032 | 0.000 | 0.597 | 0.000 | 0.629 | 0.044 | 0.685 | 0.171 | 0.372 | 0.472 | 0.067 | 0.511 | 0.678 | 0.283 | 0.411 | 0.533 | 0.383 | 0.146 | 0.000 | 0.000 | 0.548 | 0.000 | 0.116 | 0.000 | 0.014 | 0.314 | 0.000 | 0.000 |       |
| PL1A  | 0.000 | 0.619 | 0.000 | 0.000 | 0.000 | 0.527 | 0.145 | 0.537 | 0.646 | 0.054 | 0.000 | 0.000 | 0.000 | 0.000 | 0.000 | 0.000 | 0.220 | 0.000 | 0.000 | 0.000 | 0.000 | 0.783 | 0.000 | 0.000 | 0.211 | 0.000 | 0.820 | 0.821 | 0.000 | 0.042 |       |
| PL2A  | 0.000 | 0.518 | 0.000 | 0.000 | 0.728 | 0.000 | 0.048 | 0.000 | 0.000 | 0.000 | 0.233 | 0.004 | 0.000 | 0.272 | 0.240 | 0.403 | 0.493 | 0.178 | 0.000 | 0.219 | 0.794 | 0.000 | 0.000 | 0.000 | 0.000 | 0.000 | 0.011 | 0.000 | 0.000 | 0.000 |       |
| PL3A  | 0.059 | 0.232 | 0.461 | 0.061 | 0.877 | 0.031 | 0.453 | 0.195 | 0.445 | 0.278 | 0.274 | 0.145 | 0.000 | 0.734 | 0.816 | 0.429 | 0.385 | 0.298 | 0.478 | 0.026 | 0.367 | 0.085 | 0.111 | 0.000 | 0.102 | 0.000 | 0.000 | 0.033 | 0.000 | 0.000 |       |
| PL4A  | 0.553 | 0.306 | 0.000 | 0.499 | 0.727 | 0.000 | 0.262 | 0.000 | 0.079 | 0.760 | 0.000 | 0.000 | 0.052 | 0.621 | 0.000 | 0.330 | 0.421 | 0.000 | 0.562 | 0.000 | 0.000 | 0.132 | 0.329 | 0.009 | 0.638 | 0.000 | 0.000 | 0.295 | 0.184 | 0.165 |       |
| PL5A  | 0.000 | 0.145 | 0.000 | 0.000 | 0.923 | 0.000 | 0.000 | 0.496 | 0.246 | 0.171 | 0.030 | 0.244 | 0.154 | 0.000 | 0.000 | 0.000 | 0.280 | 0.488 | 0.000 | 0.000 | 0.000 | 0.492 | 0.148 | 0.000 | 0.085 | 0.000 | 0.000 | 0.000 | 0.120 | 0.000 |       |
| PL6A  | 0.443 | 0.396 | 0.144 | 0.191 | 0.910 | 0.097 | 0.000 | 0.395 | 0.000 | 0.331 | 0.628 | 0.000 | 0.000 | 0.228 | 0.000 | 0.527 | 0.103 | 0.574 | 0.056 | 0.282 | 0.000 | 0.287 | 0.000 | 0.000 | 0.363 | 0.000 | 0.304 | 0.000 | 0.000 | 0.103 |       |
| PL7A  | 0.047 | 0.107 | 0.263 | 0.000 | 0.689 | 0.000 | 0.359 | 0.196 | 0.293 | 0.205 | 0.130 | 0.342 | 0.000 | 0.260 | 0.272 | 0.433 | 0.484 | 0.381 | 0.167 | 0.647 | 0.000 | 0.000 | 0.000 | 0.000 | 0.000 | 0.000 | 0.000 | 0.000 | 0.000 | 0.038 |       |
| PL8A  | 0.507 | 0.357 | 0.000 | 0.785 | 0.671 | 0.647 | 1.056 | 0.492 | 0.843 | 0.291 | 0.093 | 0.000 | 0.000 | 0.546 | 0.000 | 0.000 | 0.408 | 0.000 | 0.712 | 0.586 | 0.142 | 0.000 | 0.086 | 0.000 | 0.447 | 0.042 | 0.000 | 0.000 | 0.065 | 0.000 | 0.019 |
| PL9A  | 0.158 | 0.291 | 0.000 | 0.271 | 0.382 | 0.000 | 0.636 | 0.338 | 0.206 | 0.450 | 0.348 | 0.107 | 0.000 | 0.513 | 0.318 | 0.209 | 0.419 | 0.376 | 0.295 | 0.310 | 0.066 | 0.000 | 0.000 | 0.291 | 0.000 | 0.000 | 0.000 | 0.000 | 0.000 | 0.000 |       |
| PP1A  | 0.320 | 0.334 | 0.828 | 0.410 | 0.516 | 0.000 | 0.624 | 0.663 | 0.370 | 0.607 | 0.027 | 0.389 | 0.000 | 0.622 | 0.720 | 0.000 | 0.201 | 0.517 | 0.737 | 0.859 | 0.536 | 0.433 | 0.204 | 0.350 | 0.822 | 0.260 | 0.350 | 0.659 | 0.220 | 0.000 |       |
| PP2A  | 0.432 | 0.535 | 0.374 | 0.237 | 0.639 | 0.085 | 0.000 | 0.079 | 0.000 | 0.131 | 0.518 | 0.000 | 0.000 | 0.429 | 0.000 | 0.000 | 0.327 | 0.561 | 0.367 | 0.405 | 0.000 | 0.123 | 0.000 | 0.396 | 0.000 | 0.729 | 0.000 | 0.000 | 0.000 | 0.141 |       |
| PP3A  | 0.474 | 0.835 | 0.442 | 0.000 | 0.089 | 0.138 | 0.000 | 0.000 | 0.099 | 0.000 | 0.768 | 0.695 | 0.245 | 0.320 | 0.221 | 0.000 | 0.000 | 0.194 | 0.307 | 0.462 | 0.000 | 0.816 | 0.230 | 0.247 | 0.351 | 0.630 | 0.163 | 0.000 | 0.267 | 0.226 |       |
| PP4A  | 0.413 | 0.606 | 0.100 | 0.097 | 0.181 | 0.176 | 0.000 | 0.000 | 0.703 | 0.000 | 0.900 | 0.053 | 0.000 | 0.000 | 0.513 | 0.043 | 0.301 | 0.000 | 0.734 | 0.089 | 0.000 | 0.331 | 0.000 | 0.206 | 0.000 | 0.000 | 0.177 | 0.510 | 0.000 | 0.000 |       |
| PP5A  | 0.000 | 0.462 | 0.000 | 0.073 | 0.000 | 0.000 | 0.163 | 0.000 | 0.000 | 0.005 | 1.058 | 0.560 | 0.000 | 0.642 | 0.100 | 0.365 | 0.548 | 0.095 | 0.291 | 0.429 | 0.049 | 0.032 | 0.000 | 0.016 | 0.139 | 0.000 | 0.000 | 0.000 | 0.124 | 0.000 |       |
| PP6A  | 0.585 | 0.206 | 0.000 | 0.290 | 0.071 | 0.399 | 0.000 | 0.000 | 0.000 | 0.000 | 0.    |       |       |       |       |       |       |       |       |       |       |       |       |       |       |       |       |       |       |       |       |

|       |       |       |       |       |       |       |       |       |       |       |        |       |       |       |       |       |       |       |       |       |       |       |       |       |       |       |       |       |       |       |       |
|-------|-------|-------|-------|-------|-------|-------|-------|-------|-------|-------|--------|-------|-------|-------|-------|-------|-------|-------|-------|-------|-------|-------|-------|-------|-------|-------|-------|-------|-------|-------|-------|
| DB6A  | 0.361 | 0.000 | 0.361 | 0.510 | 0.000 | 0.274 | 0.689 | 0.263 | 0.000 | 0.000 | 0.607  | 0.000 | 0.000 | 0.000 | 0.015 | 0.000 | 0.000 | 0.317 | 0.000 | 0.157 | 0.000 | 0.000 | 0.671 | 0.450 | 0.000 | 0.112 | 0.216 | 0.298 | 0.584 | 0.000 |       |
| DB7A  | 0.377 | 0.409 | 0.557 | 0.356 | 1.075 | 0.560 | 0.433 | 0.188 | 0.000 | 0.414 | 0.000  | 0.527 | 0.905 | 0.532 | 0.000 | 0.000 | 0.863 | 0.000 | 0.000 | 0.683 | 0.000 | 0.372 | 0.591 | 0.532 | 0.000 | 0.618 | 0.733 | 0.593 | 0.257 | 0.719 |       |
| DB8A  | 1.251 | 0.706 | 0.750 | 0.992 | 0.797 | 0.705 | 0.774 | 1.041 | 0.284 | 0.000 | 0.000  | 0.525 | 0.298 | 0.560 | 0.000 | 0.000 | 0.000 | 0.728 | 0.223 | 0.339 | 0.000 | 1.015 | 0.356 | 0.552 | 0.633 | 0.033 | 0.638 | 0.458 | 0.339 | 0.568 |       |
| DB9A  | 0.125 | 0.000 | 0.419 | 0.193 | 0.698 | 0.329 | 0.191 | 0.178 | 0.000 | 0.000 | 0.377  | 0.231 | 0.000 | 0.000 | 0.081 | 0.231 | 0.073 | 0.118 | 0.000 | 0.559 | 0.000 | 0.332 | 0.375 | 0.226 | 0.000 | 0.118 | 0.292 | 0.209 | 0.000 | 0.000 |       |
| GI10A | 0.000 | 0.000 | 0.000 | 0.000 | 0.000 | 0.225 | 0.000 | 0.176 | 0.245 | 0.000 | 0.228  | 0.419 | 0.274 | 0.000 | 0.113 | 0.298 | 0.455 | 0.000 | 0.000 | 0.570 | 0.138 | 0.000 | 0.000 | 0.054 | 0.168 | 0.246 | 0.024 | 0.070 | 0.000 | 0.371 |       |
| GI1A  | 0.118 | 0.230 | 0.956 | 0.000 | 0.335 | 0.130 | 0.506 | 0.000 | 0.000 | 0.000 | 0.000  | 0.795 | 0.000 | 0.000 | 0.621 | 0.508 | 0.000 | 0.000 | 0.091 | 0.259 | 0.000 | 0.000 | 0.449 | 0.000 | 0.000 | 0.000 | 0.114 | 0.000 | 0.000 | 0.000 |       |
| GI2A  | 0.000 | 0.000 | 0.000 | 0.159 | 0.131 | 0.000 | 0.061 | 0.377 | 0.000 | 0.452 | 0.044  | 0.571 | 0.000 | 0.393 | 0.000 | 0.186 | 0.098 | 0.198 | 0.106 | 0.362 | 0.082 | 0.464 | 0.006 | 0.000 | 0.000 | 0.000 | 0.000 | 0.280 | 0.000 | 0.000 |       |
| GI3A  | 0.728 | 0.303 | 0.457 | 0.000 | 0.001 | 0.286 | 0.419 | 0.030 | 0.000 | 0.305 | 0.342  | 0.423 | 0.240 | 0.000 | 0.036 | 0.730 | 0.000 | 0.000 | 0.000 | 0.050 | 0.000 | 0.075 | 0.000 | 0.000 | 0.453 | 0.461 | 0.143 | 0.000 | 0.000 | 0.057 |       |
| GI4A  | 0.278 | 0.269 | 0.743 | 0.177 | 0.000 | 0.000 | 0.414 | 0.173 | 0.087 | 0.270 | 0.000  | 0.488 | 0.000 | 0.000 | 0.162 | 0.654 | 0.248 | 0.000 | 0.000 | 0.701 | 0.652 | 0.105 | 0.388 | 0.000 | 0.000 | 0.224 | 0.073 | 0.000 | 0.000 | 0.000 |       |
| GI5A  | 0.000 | 0.310 | 0.495 | 0.241 | 0.070 | 0.000 | 0.022 | 0.207 | 0.000 | 0.000 | 0.000  | 0.390 | 0.000 | 0.000 | 0.326 | 0.000 | 0.000 | 0.000 | 0.000 | 0.000 | 0.252 | 0.303 | 0.000 | 0.000 | 0.142 | 0.081 | 0.000 | 0.000 | 0.005 |       |       |
| GI6A  | 0.171 | 0.000 | 0.470 | 0.000 | 0.124 | 0.449 | 0.431 | 0.000 | 0.000 | 0.162 | 0.000  | 0.741 | 0.000 | 0.000 | 0.000 | 0.000 | 0.135 | 0.000 | 0.000 | 0.367 | 0.077 | 0.372 | 0.000 | 0.000 | 0.000 | 0.000 | 0.129 | 0.000 | 0.000 | 0.000 |       |
| GI7A  | 0.112 | 0.501 | 0.000 | 0.230 | 0.000 | 0.204 | 0.000 | 0.000 | 0.000 | 0.273 | 0.276  | 0.000 | 0.191 | 0.000 | 0.373 | 0.120 | 0.000 | 0.502 | 0.000 | 0.000 | 0.032 | 0.000 | 0.000 | 0.000 | 0.000 | 0.106 | 0.198 | 0.000 | 0.000 | 0.106 |       |
| GI8A  | 0.017 | 0.000 | 0.259 | 0.055 | 0.212 | 0.000 | 0.000 | 0.127 | 0.000 | 0.000 | 0.059  | 0.319 | 0.000 | 0.339 | 0.000 | 0.166 | 0.000 | 0.000 | 0.000 | 0.309 | 0.021 | 0.000 | 0.000 | 0.000 | 0.000 | 0.187 | 0.000 | 0.000 | 0.000 | 0.000 |       |
| GI9A  | 0.403 | 0.056 | 0.436 | 0.000 | 0.185 | 0.536 | 0.153 | 0.000 | 0.000 | 0.521 | 0.445  | 0.000 | 0.000 | 0.000 | 0.000 | 0.266 | 0.000 | 0.028 | 0.000 | 0.000 | 0.377 | 0.034 | 0.000 | 0.448 | 0.000 | 0.451 | 0.421 | 0.000 | 0.000 | 0.000 |       |
| HH10A | 2.035 | 2.198 | 1.982 | 2.110 | 2.392 | 2.054 | 2.211 | 2.187 | 1.996 | 1.948 | 0.000  | 0.003 | 0.000 | 0.011 | 0.188 | 0.316 | 0.812 | 0.000 | 0.000 | 0.000 | 0.989 | 0.589 | 0.359 | 1.059 | 0.662 | 0.941 | 0.469 | 1.256 | 0.000 | 1.169 |       |
| HH1A  | 1.125 | 2.351 | 2.585 | 2.286 | 2.049 | 2.066 | 2.290 | 2.338 | 2.175 | 1.989 | 0.000  | 0.000 | 0.000 | 0.000 | 0.244 | 0.072 | 0.251 | 0.000 | 0.022 | 0.970 | 0.680 | 0.499 | 1.156 | 0.869 | 1.091 | 0.300 | 1.246 | 0.000 | 0.771 |       |       |
| HH2A  | 2.198 | 2.420 | 2.246 | 2.603 | 2.154 | 2.296 | 2.365 | 2.439 | 2.210 | 2.236 | 0.000  | 0.305 | 0.000 | 0.182 | 0.365 | 0.000 | 0.368 | 0.000 | 0.207 | 0.166 | 1.119 | 1.137 | 0.813 | 1.135 | 1.151 | 1.051 | 0.892 | 1.402 | 0.613 | 1.186 |       |
| HH3A  | 2.219 | 2.319 | 2.236 | 2.268 | 2.334 | 2.253 | 2.619 | 2.279 | 2.263 | 1.957 | 0.000  | 0.051 | 0.000 | 0.016 | 0.016 | 0.000 | 0.000 | 0.035 | 0.000 | 0.227 | 0.034 | 1.027 | 1.018 | 0.535 | 1.211 | 1.063 | 1.209 | 1.027 | 1.365 | 0.314 | 1.189 |
| HH4A  | 2.258 | 2.401 | 2.152 | 2.427 | 2.324 | 2.257 | 2.281 | 2.650 | 2.284 | 2.051 | 0.000  | 0.000 | 0.000 | 0.000 | 0.298 | 0.344 | 0.436 | 0.000 | 0.166 | 0.190 | 0.920 | 0.777 | 0.518 | 1.055 | 0.812 | 1.157 | 0.627 | 1.247 | 0.756 | 0.966 |       |
| HH5A  | 2.155 | 2.433 | 2.230 | 2.435 | 2.203 | 2.574 | 2.289 | 2.376 | 2.074 | 2.071 | 0.000  | 0.000 | 0.000 | 0.000 | 0.000 | 0.000 | 0.473 | 0.000 | 0.000 | 0.059 | 1.002 | 0.968 | 0.657 | 0.917 | 1.020 | 1.248 | 0.886 | 1.369 | 0.031 | 1.122 |       |
| HH6A  | 2.511 | 2.270 | 2.183 | 2.343 | 2.007 | 2.075 | 2.241 | 2.317 | 2.397 | 2.327 | 0.000  | 0.239 | 0.000 | 0.000 | 0.000 | 0.273 | 0.169 | 0.000 | 0.000 | 0.228 | 1.149 | 1.153 | 0.674 | 1.387 | 1.021 | 1.254 | 0.525 | 1.268 | 0.169 | 1.489 |       |
| HH7A  | 2.112 | 2.150 | 2.096 | 2.281 | 1.906 | 2.155 | 2.095 | 2.178 | 2.285 | 2.783 | 0.000  | 0.872 | 0.160 | 0.000 | 0.000 | 0.000 | 0.204 | 0.000 | 0.000 | 0.000 | 1.358 | 1.417 | 1.018 | 1.439 | 1.251 | 1.409 | 0.871 | 1.371 | 1.121 | 1.360 |       |
| HH8A  | 2.104 | 2.117 | 1.951 | 2.048 | 1.774 | 1.890 | 2.105 | 2.231 | 2.607 | 2.007 | 0.000  | 0.000 | 0.000 | 0.000 | 0.000 | 0.194 | 0.000 | 0.000 | 0.373 | 0.000 | 1.068 | 0.570 | 0.359 | 0.910 | 0.798 | 0.884 | 0.285 | 0.929 | 0.672 | 0.726 |       |
| HH9A  | 2.637 | 2.677 | 2.143 | 2.401 | 2.110 | 2.200 | 2.215 | 2.413 | 2.129 | 2.119 | 0.000  | 0.000 | 0.000 | 0.196 | 0.000 | 0.184 | 0.378 | 0.000 | 0.000 | 0.000 | 1.106 | 0.951 | 0.333 | 1.110 | 0.919 | 1.351 | 0.960 | 1.285 | 0.180 | 1.259 |       |
| NV10A | 0.365 | 0.549 | 0.095 | 0.619 | 0.430 | 0.000 | 0.138 | 0.000 | 0.000 | 0.000 | 0.000  | 0.097 | 0.061 | 1.681 | 2.311 | 2.207 | 2.155 | 1.963 | 2.201 | 2.354 | 2.227 | 0.399 | 0.317 | 0.683 | 0.887 | 0.000 | 0.819 | 0.693 | 0.664 | 0.000 | 0.017 |
| NV1A  | 0.964 | 0.542 | 0.486 | 0.424 | 0.276 | 0.059 | 0.465 | 0.413 | 0.324 | 0.000 | 2.107  | 1.953 | 2.323 | 2.359 | 2.156 | 1.852 | 1.735 | 2.194 | 2.352 | 1.853 | 0.000 | 0.457 | 0.871 | 0.495 | 0.028 | 0.000 | 0.506 | 0.275 | 0.374 | 0.202 |       |
| NV2A  | 0.386 | 0.000 | 0.000 | 0.364 | 0.000 | 0.119 | 0.249 | 0.000 | 0.000 | 0.000 | 0.1792 | 2.378 | 1.879 | 2.392 | 2.419 | 2.166 | 2.119 | 1.693 | 1.960 | 2.232 | 0.276 | 0.292 | 0.309 | 0.423 | 0.588 | 0.523 | 0.709 | 0.465 | 0.177 | 0.436 |       |
| NV3A  | 0.000 | 0.003 | 0.000 | 0.418 | 0.836 | 0.865 | 0.600 | 0.201 | 0.000 | 0.000 | 2.007  | 2.222 | 1.696 | 2.150 | 2.490 | 2.279 | 2.620 | 1.677 | 1.844 | 2.405 | 0.047 | 0.511 | 0.682 | 0.375 | 0.273 | 0.675 | 0.737 | 0.406 | 0.012 | 0.136 |       |
| NV4A  | 0.000 | 0.000 | 0.000 | 0.377 | 0.871 | 0.052 | 0.358 | 0.071 | 0.000 | 0.283 | 1.940  | 2.051 | 1.721 | 2.207 | 2.179 | 2.077 | 2.329 | 2.056 | 2.008 | 2.613 | 0.000 | 0.055 | 0.319 | 0.561 | 0.000 | 0.874 | 0.808 | 0.383 | 0.602 | 0.296 |       |
| NV5A  | 0.265 | 0.000 | 0.000 | 0.321 | 0.317 | 0.219 | 0.066 | 0.000 | 0.041 | 0.000 | 0.216  | 2.219 | 2.040 | 2.267 | 2.423 | 2.194 | 2.085 | 1.945 | 2.075 | 2.227 | 0.000 | 0.353 | 0.615 | 0.268 | 0.000 | 0.439 | 0.662 | 0.480 | 0.565 | 0.000 |       |
| NV6A  | 0.000 | 0.000 | 0.276 | 0.000 | 0.000 | 0.000 | 0.000 | 0.000 | 0.235 | 2.288 | 1.872  | 2.144 | 2.145 | 2.139 | 2.201 | 1.972 | 2.069 | 2.168 | 2.137 | 0.000 | 0.375 | 0.445 | 0.696 | 0.000 | 0.741 | 0.660 | 0.556 | 0.372 | 0.396 |       |       |
| NV7A  | 0.321 | 0.010 | 0.000 | 0.080 | 0.753 | 0.392 | 0.693 | 0.039 | 0.000 | 0.000 | 2.114  | 1.957 | 2.206 | 2.242 | 2.439 | 2.236 | 2.147 | 1.905 | 2.277 | 2.081 | 0.000 | 0.577 | 0.411 | 0.494 | 0.120 | 0.280 | 0.399 | 0.248 | 0.122 | 0.188 |       |
| NV8A  | 0.000 | 0.000 | 0.000 | 0.144 | 0.000 | 0.168 | 0.164 | 0.000 | 0.000 | 0.000 | 2.169  | 2.057 | 2.056 | 2.177 | 2.434 | 2.574 | 2.182 | 1.806 | 2.159 | 2.310 | 0.000 | 0.000 | 0.425 | 0.426 | 0.000 | 0.363 | 0.490 | 0.000 | 0.000 | 0.468 |       |
| NV9A  | 0.588 | 0.000 | 0.000 | 0.000 | 0.000 | 0.018 | 0.164 | 0.083 | 0.089 | 0.000 | 1.895  | 1.828 | 1.461 | 2.061 | 2.056 | 2.117 | 1.917 | 1.921 | 2.244 | 1.971 | 0.000 | 0.175 | 0.841 | 0.779 | 0.000 | 0.866 | 0.507 | 0.805 | 0.360 | 0.000 |       |
| PL10A | 1.199 | 1.021 | 0.981 | 1.005 | 0.829 | 0.980 | 0.592 | 0.724 | 0.463 | 1.041 | 0.000  | 0.170 | 0.000 | 0.197 | 0.217 | 0.690 | 0.484 | 0.358 | 0.260 | 0.183 | 2.151 | 2.731 | 2.126 | 2.256 | 1.985 | 2.233 | 1.984 | 2.241 | 2.292 | 2.277 |       |
| PL1A  | 1.704 | 1.096 | 1.368 | 1.340 | 1.113 | 1.150 | 1.206 | 1.145 | 1.309 | 1.111 | 0.497  | 0.000 | 0.975 | 0.000 | 0.520 | 0.329 | 0.258 | 0.725 | 0.000 | 0.155 | 2.143 | 2.013 | 1.869 | 1.881 | 1.751 | 1.713 | 1.184 | 1.643 | 2.009 | 2.133 |       |
| PL2A  | 1.126 | 0.939 | 0.635 | 1.071 | 1.065 | 1.133 | 0.740 | 1.114 | 0.590 | 1.071 | 0.334  | 0.149 | 0.383 | 0.260 | 0.419 | 0.268 | 0.597 | 0.577 | 0.348 | 0.000 | 0.128 | 2.190 | 2.336 | 2.262 | 1.885 | 1.968 | 2.388 | 2.628 | 2.607 |       |       |
| PL3A  | 1.261 | 0.991 | 0.602 | 1.145 | 0.836 | 1.095 | 0.723 | 0.785 | 0.469 | 1.014 | 0.289  | 0.684 | 0.497 | 0.357 | 0.505 | 0.291 | 0.683 | 0.588 | 0.296 | 0.097 | 2.245 | 2.213 | 2.281 | 2.412 | 2.260 | 2.239 | 2.003 | 2.601 | 2.077 | 2.494 |       |
| PL4A  | 1.006 | 0.731 | 0.498 | 0.927 | 0.870 | 0.878 | 0.846 | 0.778 | 0.605 | 1.280 | 0.483  | 0.391 | 0.518 | 0.535 | 0.431 | 0.496 | 0.444 | 0.564 | 0.000 | 0.506 | 2.092 | 2.252 | 2.107 | 2.129 | 2.215 | 2.537 | 2.117 | 2.246 | 2.199 | 2.228 |       |
| PL5A  | 1.101 | 0.862 | 0.407 | 1.189 | 0.927 | 1.245 | 1.142 | 1.019 | 0.884 | 1.043 | 0.053  | 0.000 | 0.458 | 0.000 | 0.237 |       |       |       |       |       |       |       |       |       |       |       |       |       |       |       |       |

|       |       |       |       |       |       |       |       |       |       |       |       |       |       |       |       |       |       |       |       |       |       |       |       |       |       |       |       |       |       |       |
|-------|-------|-------|-------|-------|-------|-------|-------|-------|-------|-------|-------|-------|-------|-------|-------|-------|-------|-------|-------|-------|-------|-------|-------|-------|-------|-------|-------|-------|-------|-------|
| CF7A  | 0.293 | 0.000 | 0.719 | 0.232 | 0.166 | 0.185 | 0.706 | 0.704 | 0.000 | 0.000 | 0.156 | 0.000 | 0.000 | 0.000 | 0.293 | 0.493 | 0.597 | 0.456 | 0.537 | 0.961 | 0.881 | 0.366 | 0.637 | 0.804 | 0.000 | 1.155 | 0.293 | 0.000 | 0.719 |       |
| CF8A  | 0.000 | 0.156 | 0.489 | 0.000 | 0.279 | 0.000 | 0.435 | 0.673 | 0.766 | 0.580 | 0.000 | 0.808 | 1.122 | 0.738 | 0.092 | 0.553 | 0.748 | 0.474 | 0.272 | 0.000 | 0.387 | 0.000 | 0.008 | 0.000 | 0.366 | 0.000 | 0.532 | 0.000 | 0.156 | 0.489 |
| CF9A  | 0.633 | 0.000 | 0.280 | 0.403 | 0.342 | 0.462 | 0.481 | 0.301 | 0.626 | 0.850 | 0.464 | 0.000 | 0.948 | 0.556 | 0.533 | 0.502 | 0.192 | 0.801 | 0.773 | 0.160 | 0.242 | 0.838 | 0.184 | 0.602 | 1.138 | 0.000 | 0.736 | 0.633 | 0.000 | 0.280 |
| DB10A | 0.617 | 0.208 | 0.384 | 0.860 | 0.629 | 0.428 | 0.201 | 0.228 | 0.477 | 0.397 | 0.077 | 0.592 | 0.408 | 0.335 | 0.957 | 0.716 | 0.791 | 0.363 | 0.779 | 0.465 | 0.672 | 0.344 | 0.836 | 0.208 | 0.775 | 0.644 | 0.697 | 0.617 | 0.208 | 0.384 |
| DB1A  | 0.784 | 0.000 | 0.663 | 0.468 | 0.290 | 0.001 | 0.535 | 0.288 | 0.196 | 0.000 | 0.320 | 0.636 | 0.153 | 0.000 | 0.089 | 0.171 | 0.062 | 0.403 | 0.333 | 0.231 | 0.384 | 0.176 | 0.368 | 0.008 | 0.318 | 0.000 | 0.801 | 0.784 | 0.000 | 0.663 |
| DB2A  | 0.444 | 0.920 | 0.577 | 0.535 | 0.505 | 0.569 | 0.490 | 0.461 | 0.000 | 0.264 | 0.222 | 0.228 | 0.382 | 0.185 | 0.418 | 0.265 | 0.707 | 0.347 | 1.140 | 0.974 | 0.599 | 0.460 | 0.391 | 0.000 | 0.932 | 0.451 | 0.267 | 0.444 | 0.920 | 0.577 |
| DB3A  | 0.883 | 0.000 | 0.537 | 0.018 | 0.437 | 0.828 | 0.118 | 0.476 | 0.839 | 0.095 | 0.088 | 0.577 | 0.149 | 0.800 | 0.943 | 0.369 | 0.742 | 0.224 | 1.011 | 0.723 | 0.814 | 0.491 | 0.421 | 0.531 | 0.980 | 0.027 | 0.650 | 0.883 | 0.000 | 0.537 |
| DB4A  | 0.031 | 0.253 | 0.000 | 0.323 | 0.000 | 0.000 | 0.000 | 0.574 | 0.725 | 0.112 | 0.341 | 0.862 | 0.283 | 1.071 | 0.377 | 0.459 | 0.014 | 0.712 | 0.530 | 0.060 | 0.549 | 0.867 | 0.527 | 0.000 | 0.000 | 0.000 | 0.531 | 0.031 | 0.253 | 0.000 |
| DB5A  | 0.000 | 0.002 | 0.524 | 0.191 | 0.134 | 0.321 | 0.000 | 0.752 | 0.617 | 0.271 | 0.000 | 0.408 | 0.023 | 0.691 | 0.953 | 0.364 | 0.929 | 0.397 | 1.087 | 0.405 | 0.590 | 0.257 | 0.777 | 0.572 | 0.802 | 0.533 | 0.440 | 0.000 | 0.002 | 0.524 |
| DB6A  | 0.194 | 0.239 | 0.174 | 0.508 | 0.209 | 0.302 | 0.000 | 0.658 | 0.520 | 0.000 | 0.563 | 0.640 | 0.774 | 0.237 | 0.182 | 0.087 | 0.637 | 0.400 | 0.588 | 0.000 | 0.677 | 0.270 | 0.509 | 0.572 | 0.436 | 0.027 | 0.048 | 0.194 | 0.239 | 0.174 |
| DB7A  | 0.006 | 0.011 | 0.024 | 0.380 | 0.382 | 0.000 | 0.000 | 0.635 | 0.748 | 0.383 | 0.000 | 1.078 | 0.664 | 1.070 | 0.190 | 0.427 | 0.663 | 0.000 | 0.041 | 0.000 | 0.053 | 0.000 | 0.153 | 0.000 | 0.188 | 0.000 | 0.362 | 0.006 | 0.011 | 0.024 |
| DB8A  | 0.000 | 0.000 | 0.081 | 0.186 | 0.167 | 0.365 | 0.000 | 0.029 | 0.334 | 0.277 | 0.136 | 0.548 | 0.627 | 0.618 | 0.511 | 0.143 | 0.429 | 0.612 | 0.718 | 0.403 | 0.309 | 0.224 | 0.245 | 0.758 | 0.000 | 0.000 | 0.764 | 0.000 | 0.000 | 0.081 |
| DB9A  | 0.303 | 0.000 | 0.000 | 0.067 | 0.791 | 0.000 | 0.000 | 0.274 | 0.401 | 0.228 | 0.260 | 0.362 | 0.300 | 0.000 | 0.537 | 0.000 | 0.229 | 0.074 | 0.322 | 0.000 | 0.445 | 0.009 | 0.543 | 0.739 | 0.481 | 0.185 | 0.186 | 0.303 | 0.000 | 0.000 |
| GI10A | 0.013 | 0.425 | 0.000 | 0.000 | 0.517 | 0.000 | 0.000 | 0.080 | 0.110 | 0.000 | 0.427 | 0.672 | 0.287 | 0.950 | 0.000 | 0.661 | 0.801 | 0.262 | 0.000 | 0.018 | 0.000 | 0.000 | 0.000 | 0.122 | 0.000 | 0.000 | 0.407 | 0.013 | 0.425 | 0.000 |
| GI1A  | 0.133 | 0.000 | 0.445 | 0.084 | 0.620 | 0.123 | 0.000 | 0.293 | 0.542 | 0.387 | 0.733 | 0.000 | 0.399 | 0.271 | 0.730 | 0.401 | 0.597 | 0.242 | 0.000 | 0.000 | 0.282 | 0.672 | 0.503 | 0.000 | 0.389 | 0.238 | 0.410 | 0.133 | 0.000 | 0.445 |
| GI2A  | 0.603 | 0.447 | 0.345 | 0.000 | 0.727 | 0.000 | 0.000 | 0.000 | 0.000 | 0.123 | 0.050 | 0.000 | 0.217 | 0.302 | 0.006 | 0.203 | 0.536 | 0.455 | 0.354 | 0.615 | 0.421 | 0.231 | 0.990 | 0.000 | 0.765 | 0.498 | 0.164 | 0.603 | 0.447 | 0.345 |
| GI3A  | 0.195 | 0.510 | 0.070 | 0.000 | 0.361 | 0.435 | 0.000 | 0.651 | 0.160 | 0.000 | 0.000 | 0.185 | 0.412 | 0.500 | 0.396 | 0.690 | 0.632 | 0.000 | 0.000 | 0.328 | 0.000 | 0.000 | 0.000 | 0.100 | 0.000 | 0.606 | 0.195 | 0.510 | 0.070 |       |
| GI4A  | 0.870 | 0.506 | 0.239 | 0.406 | 0.737 | 0.116 | 0.326 | 0.704 | 0.396 | 0.908 | 0.486 | 0.000 | 0.379 | 0.303 | 0.112 | 0.527 | 0.786 | 0.228 | 0.000 | 0.000 | 0.388 | 0.230 | 0.717 | 0.000 | 0.290 | 0.900 | 0.976 | 0.870 | 0.506 | 0.239 |
| GI5A  | 0.000 | 0.386 | 0.067 | 0.290 | 0.508 | 0.443 | 0.000 | 0.288 | 0.000 | 0.271 | 0.336 | 0.000 | 0.324 | 0.270 | 0.079 | 0.294 | 0.492 | 0.177 | 0.000 | 0.621 | 0.000 | 0.196 | 0.000 | 0.000 | 0.000 | 0.272 | 0.464 | 0.000 | 0.386 | 0.067 |
| GI6A  | 0.243 | 0.077 | 0.434 | 0.000 | 0.508 | 0.000 | 0.000 | 0.491 | 0.000 | 0.172 | 0.310 | 0.089 | 0.000 | 0.576 | 0.000 | 0.255 | 0.298 | 0.420 | 0.000 | 0.114 | 0.009 | 0.366 | 0.553 | 0.000 | 0.216 | 0.000 | 0.471 | 0.243 | 0.077 | 0.434 |
| GI7A  | 0.167 | 0.479 | 0.000 | 0.544 | 0.275 | 0.000 | 0.033 | 0.000 | 0.244 | 0.398 | 0.043 | 0.001 | 0.244 | 0.246 | 0.243 | 0.000 | 0.000 | 0.000 | 0.000 | 0.000 | 0.210 | 0.000 | 0.000 | 0.211 | 0.188 | 0.000 | 0.000 | 0.167 | 0.479 | 0.000 |
| GI8A  | 0.000 | 0.403 | 0.000 | 0.000 | 0.470 | 0.163 | 0.000 | 0.022 | 0.365 | 0.268 | 0.366 | 0.000 | 0.000 | 0.270 | 0.000 | 0.599 | 0.045 | 0.218 | 0.030 | 0.022 | 0.084 | 0.535 | 0.000 | 0.479 | 0.000 | 0.000 | 0.000 | 0.000 | 0.403 | 0.000 |
| GI9A  | 0.385 | 0.146 | 0.075 | 0.259 | 0.469 | 0.000 | 0.000 | 0.089 | 0.705 | 0.351 | 0.479 | 0.000 | 0.611 | 0.525 | 0.293 | 0.053 | 0.589 | 0.313 | 0.000 | 0.000 | 0.870 | 0.058 | 0.000 | 0.000 | 0.000 | 0.000 | 0.000 | 0.385 | 0.146 | 0.075 |
| HH10A | 0.662 | 0.401 | 0.687 | 0.693 | 0.410 | 0.690 | 0.391 | 0.628 | 0.597 | 0.000 | 0.127 | 0.602 | 0.000 | 0.465 | 0.427 | 0.404 | 0.632 | 0.651 | 0.942 | 0.755 | 0.769 | 0.822 | 0.584 | 0.000 | 0.913 | 0.372 | 1.068 | 0.662 | 0.401 | 0.687 |
| HH1A  | 0.261 | 0.351 | 0.206 | 0.702 | 0.000 | 0.812 | 0.000 | 0.000 | 0.359 | 0.000 | 0.176 | 0.086 | 0.414 | 0.492 | 0.523 | 0.947 | 0.329 | 0.208 | 0.321 | 0.763 | 0.327 | 0.670 | 0.657 | 0.129 | 0.417 | 0.504 | 0.000 | 0.261 | 0.351 | 0.206 |
| HH2A  | 0.898 | 0.550 | 0.579 | 0.275 | 0.496 | 0.885 | 0.166 | 0.549 | 0.398 | 0.000 | 0.397 | 0.000 | 0.000 | 0.556 | 0.000 | 0.150 | 0.674 | 0.306 | 0.355 | 0.962 | 0.000 | 0.760 | 0.514 | 0.000 | 0.713 | 0.000 | 0.990 | 0.898 | 0.550 | 0.579 |
| HH3A  | 0.944 | 0.453 | 0.471 | 0.652 | 0.601 | 0.737 | 0.415 | 0.030 | 0.331 | 0.697 | 0.000 | 0.276 | 0.000 | 0.118 | 0.162 | 0.494 | 0.294 | 0.692 | 0.300 | 0.240 | 0.325 | 0.763 | 0.090 | 0.000 | 0.517 | 0.345 | 0.518 | 0.944 | 0.453 | 0.471 |
| HH4A  | 1.039 | 0.646 | 0.432 | 0.395 | 0.546 | 0.943 | 0.479 | 0.426 | 0.107 | 0.000 | 0.028 | 0.000 | 0.000 | 0.358 | 0.076 | 0.556 | 0.425 | 0.427 | 0.472 | 0.000 | 0.710 | 0.193 | 0.000 | 0.161 | 0.000 | 0.750 | 1.039 | 0.646 | 0.432 |       |
| HH5A  | 0.684 | 0.232 | 0.170 | 0.239 | 0.384 | 0.608 | 0.191 | 0.444 | 0.487 | 0.000 | 0.560 | 0.000 | 0.362 | 0.827 | 0.452 | 0.354 | 0.250 | 0.076 | 0.209 | 0.614 | 0.056 | 0.604 | 0.524 | 0.000 | 0.501 | 0.330 | 0.781 | 0.684 | 0.232 | 0.170 |
| HH6A  | 0.945 | 0.304 | 0.284 | 0.388 | 0.831 | 0.731 | 0.153 | 0.000 | 0.000 | 0.000 | 0.115 | 0.428 | 0.339 | 0.179 | 0.551 | 0.100 | 0.415 | 0.296 | 0.843 | 0.688 | 0.218 | 0.546 | 0.198 | 0.000 | 0.422 | 0.694 | 1.056 | 0.945 | 0.304 | 0.284 |
| HH7A  | 1.065 | 0.470 | 0.591 | 0.221 | 0.761 | 1.002 | 0.470 | 0.000 | 0.074 | 0.281 | 0.528 | 0.114 | 0.111 | 0.295 | 0.248 | 0.174 | 0.267 | 0.359 | 0.018 | 0.544 | 0.000 | 0.640 | 0.445 | 0.012 | 0.033 | 0.454 | 0.692 | 1.065 | 0.470 | 0.591 |
| HH8A  | 0.613 | 0.158 | 0.000 | 0.295 | 0.397 | 0.763 | 0.644 | 0.000 | 0.443 | 0.000 | 0.280 | 0.313 | 0.297 | 0.112 | 0.076 | 0.181 | 0.000 | 0.211 | 0.459 | 0.000 | 0.000 | 0.335 | 0.000 | 0.003 | 0.103 | 0.718 | 0.989 | 0.613 | 0.158 | 0.000 |
| HH9A  | 0.944 | 0.285 | 0.398 | 0.608 | 0.730 | 0.767 | 0.745 | 0.000 | 0.352 | 0.000 | 0.211 | 0.352 | 0.000 | 0.156 | 0.011 | 0.156 | 0.850 | 0.547 | 0.188 | 0.378 | 0.354 | 0.856 | 0.667 | 0.000 | 0.533 | 0.514 | 0.791 | 0.944 | 0.285 | 0.398 |
| NV10A | 0.000 | 0.303 | 0.000 | 0.089 | 0.000 | 0.113 | 0.281 | 0.362 | 0.403 | 0.864 | 0.106 | 0.509 | 0.722 | 0.691 | 0.801 | 0.419 | 0.969 | 0.176 | 0.194 | 0.489 | 0.677 | 0.511 | 0.016 | 0.117 | 0.587 | 0.519 | 0.694 | 0.000 | 0.303 | 0.000 |
| NV1A  | 0.000 | 0.000 | 0.000 | 0.669 | 0.000 | 0.534 | 0.001 | 0.000 | 0.213 | 0.000 | 0.000 | 0.000 | 0.000 | 0.176 | 0.000 | 0.000 | 0.526 | 0.681 | 0.047 | 0.464 | 0.712 | 0.867 | 0.009 | 0.402 | 0.674 | 0.549 | 0.163 | 0.000 | 0.000 | 0.000 |
| NV2A  | 0.000 | 0.092 | 0.518 | 0.123 | 0.000 | 0.362 | 0.386 | 0.000 | 0.665 | 0.235 | 0.000 | 0.177 | 0.396 | 0.327 | 0.451 | 0.094 | 0.522 | 0.389 | 0.000 | 0.496 | 0.307 | 0.000 | 0.000 | 0.615 | 0.538 | 0.401 | 0.156 | 0.000 | 0.092 | 0.518 |
| NV3A  | 0.456 | 0.000 | 0.524 | 0.632 | 0.000 | 0.000 | 0.319 | 0.216 | 0.568 | 0.866 | 0.505 | 0.681 | 0.695 | 0.761 | 0.696 | 0.362 | 0.795 | 0.034 | 0.816 | 0.910 | 0.770 | 0.728 | 0.706 | 0.772 | 0.107 | 0.826 | 0.968 | 0.456 | 0.000 | 0.524 |
| NV4A  | 0.000 | 0.506 | 0.045 | 0.259 | 0.291 | 0.016 | 0.000 | 0.399 | 0.084 | 0.975 | 0.203 | 0.880 | 0.458 | 0.778 | 0.725 | 0.789 | 0.944 | 0.338 | 0.082 | 0.725 | 0.000 | 0.337 | 0.365 | 0.204 | 0.516 | 0.581 | 0.768 | 0.000 | 0.506 | 0.045 |
| NV5A  | 0.436 | 0.000 | 0.397 | 0.404 | 0.329 | 0.191 | 0.732 | 0.201 | 0.000 | 0.301 | 0.206 | 0.427 | 0.000 | 0.306 | 0.000 | 0.520 | 0.661 | 0.063 | 0.000 | 0.505 | 0.557 | 0.259 | 0.413 | 0.279 | 0.755 | 0.540 | 0.669 | 0.436 | 0.000 | 0.397 |
| NV6A  | 0.333 | 0.266 | 0.267 | 0.000 | 0.000 | 0.085 | 0.000 | 0.647 | 0.322 | 0.509 | 0.408 | 0.063 | 0.689 | 0.009 | 0.005 | 0.000 | 0     |       |       |       |       |       |       |       |       |       |       |       |       |       |

**Table S4** Average Bruker scores for all 81 pairwise species comparisons.

|                   |    | Test spectra |       |       |       |       |       |       |       |       |
|-------------------|----|--------------|-------|-------|-------|-------|-------|-------|-------|-------|
|                   |    | CF           | DB    | GI    | HH    | NV    | PL    | PP    | PR    | PS    |
| Reference spectra | CF | 1.552        | 0.419 | 0.385 | 0.371 | 0.218 | 0.335 | 0.340 | 0.364 | 0.471 |
|                   | DB | 0.378        | 1.569 | 0.326 | 0.409 | 0.372 | 0.290 | 0.273 | 0.413 | 0.412 |
|                   | GI | 0.274        | 0.380 | 1.847 | 0.165 | 0.160 | 0.088 | 0.230 | 0.294 | 0.188 |
|                   | HH | 0.350        | 0.167 | 0.271 | 2.233 | 0.093 | 0.929 | 0.531 | 0.252 | 0.419 |
|                   | NV | 0.318        | 0.418 | 0.169 | 0.182 | 2.109 | 0.366 | 0.179 | 0.359 | 0.397 |
|                   | PL | 0.277        | 0.240 | 0.100 | 0.909 | 0.359 | 2.239 | 0.334 | 0.432 | 0.309 |
|                   | PP | 0.250        | 0.302 | 0.187 | 0.364 | 0.151 | 0.427 | 2.022 | 0.321 | 0.335 |
|                   | PR | 0.206        | 0.302 | 0.302 | 0.233 | 0.238 | 0.205 | 0.287 | 2.104 | 0.149 |
|                   | PS | 0.474        | 0.388 | 0.258 | 0.399 | 0.351 | 0.287 | 0.397 | 0.283 | 2.145 |

CF = *Capocoris fuscispinus*, DB = *Dolycoris baccarum*, GI = *Graphosoma italicum*, HH = *Halyomorpha halys*, NV = *Nezara viridula*, PL =

*Piezodorus lituratus*, PP = *Palomena prasina*, PR = *Pentatoma rufipes*, and PS = *Peribalus strictus*.

**Table S5** Standard errors of Bruker scores for all 81 pairwise species comparisons.

|                   |    | Test spectra |       |       |       |       |       |       |       |       |
|-------------------|----|--------------|-------|-------|-------|-------|-------|-------|-------|-------|
|                   |    | CF           | DB    | GI    | HH    | NV    | PL    | PP    | PR    | PS    |
| Reference spectra | CF | 0.476        | 0.290 | 0.261 | 0.273 | 0.280 | 0.303 | 0.274 | 0.311 | 0.344 |
|                   | DB | 0.313        | 0.454 | 0.272 | 0.347 | 0.313 | 0.275 | 0.271 | 0.286 | 0.300 |
|                   | GI | 0.258        | 0.317 | 0.353 | 0.201 | 0.216 | 0.150 | 0.233 | 0.245 | 0.248 |
|                   | HH | 0.270        | 0.211 | 0.239 | 0.183 | 0.164 | 0.351 | 0.265 | 0.231 | 0.306 |
|                   | NV | 0.287        | 0.337 | 0.193 | 0.245 | 0.220 | 0.271 | 0.209 | 0.299 | 0.286 |
|                   | PL | 0.280        | 0.224 | 0.195 | 0.307 | 0.232 | 0.215 | 0.286 | 0.268 | 0.287 |
|                   | PP | 0.257        | 0.281 | 0.234 | 0.266 | 0.241 | 0.311 | 0.294 | 0.247 | 0.289 |
|                   | PR | 0.243        | 0.250 | 0.277 | 0.252 | 0.271 | 0.254 | 0.237 | 0.240 | 0.199 |
|                   | PS | 0.328        | 0.289 | 0.259 | 0.253 | 0.256 | 0.236 | 0.282 | 0.259 | 0.283 |

CF = *Capocoris fuscispinus*, DB = *Dolycoris baccarum*, GI = *Graphosoma italicum*, HH = *Halyomorpha halys*, NV = *Nezara viridula*, PL =

*Piezodorus lituratus*, PP = *Palomena prasina*, PR = *Pentatoma rufipes*, and PS = *Peribalus strictus*.

The data from Tables S4 and S5 are shown graphically in Figure 2.
